# Supplementary material for: High performance alumina based graphene nanocomposites with novel electrical and dielectric properties
Source: Royal Society of Chemistry journal article supplement (doi:10.1039/c5ra01481f), 2015-01-01
Supplement: c5ra01481f1.pdf [file c5ra01481f1.pdf]

Supporting information for RSC Advances

High Performance Alumina based Graphene Nanocomposites with Novel  
Electrical and Dielectric properties

Kaleem Ahmad\*, Wei Pan and Hui Wu

[\*] Kaleem Ahmad, Wei Pan, Hui Wu

State Key Laboratory of New Ceramics and Fine Processing,

School of Materials Science and Engineering,

Tsinghua University, Beijing, 100084, People's Republic of China

Fax: +86-10-62771160

E-mail: kahmad@mail.tsinghua.edu.cn

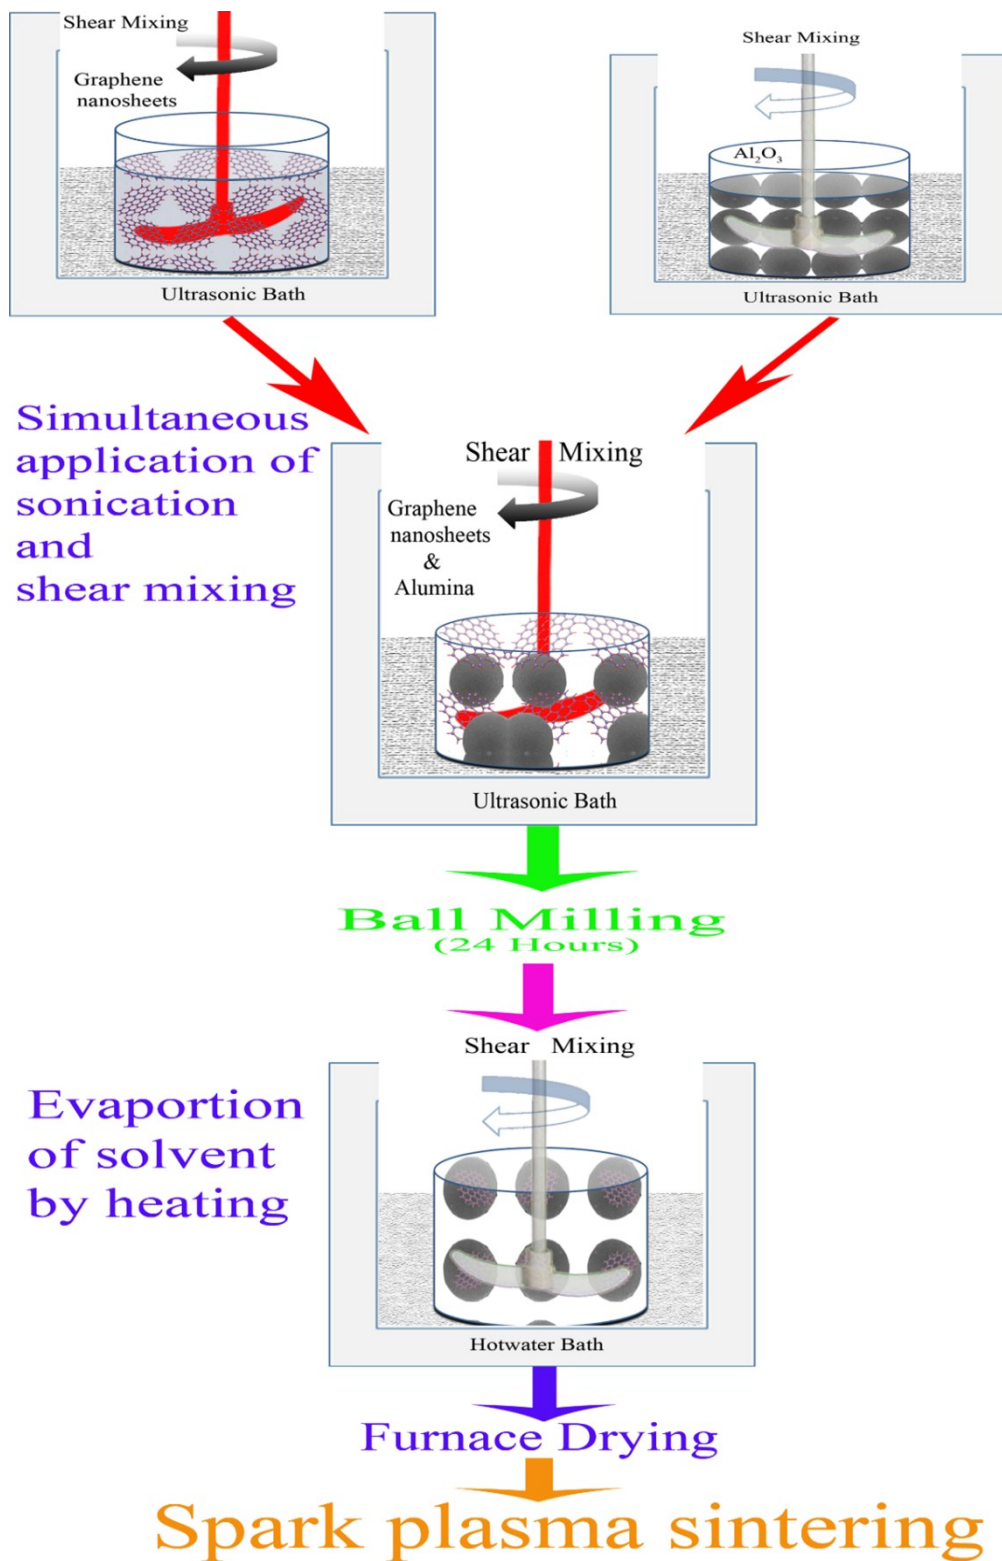

**Figure S1.** Schematic illustration of multistep processing for uniform mixing of graphene nanosheets in alumina powder
